# Supplementary material for: Combination of High-density Microelectrode Array and Patch Clamp Recordings to Enable Studies of Multisynaptic Integration
Source: PubMed Central journal article supplement (PMC5430511; doi:10.1038/s41598-017-00981-4), 2017-04-20
Supplement: 41598_2017_981_MOESM1_ESM.pdf [file 41598_2017_981_MOESM1_ESM.pdf]

# Combination of High-density Microelectrode Array and Patch Clamp Recordings to Enable Studies of Multisynaptic Integration

## **Authors**

David Jäckel, Douglas J. Bakkum, Thomas L. Russell, Jan Müller, Milos Radivojevic, Urs Frey, Felix Franke, and Andreas Hierlemann\*

ETH Zurich, Department of Biosystems Science and Engineering, 4058 Basel, Switzerland

\* *Correspondence to: [andreas.hierlemann@bsse.ethz.ch](mailto:andreas.hierlemann@bsse.ethz.ch)*

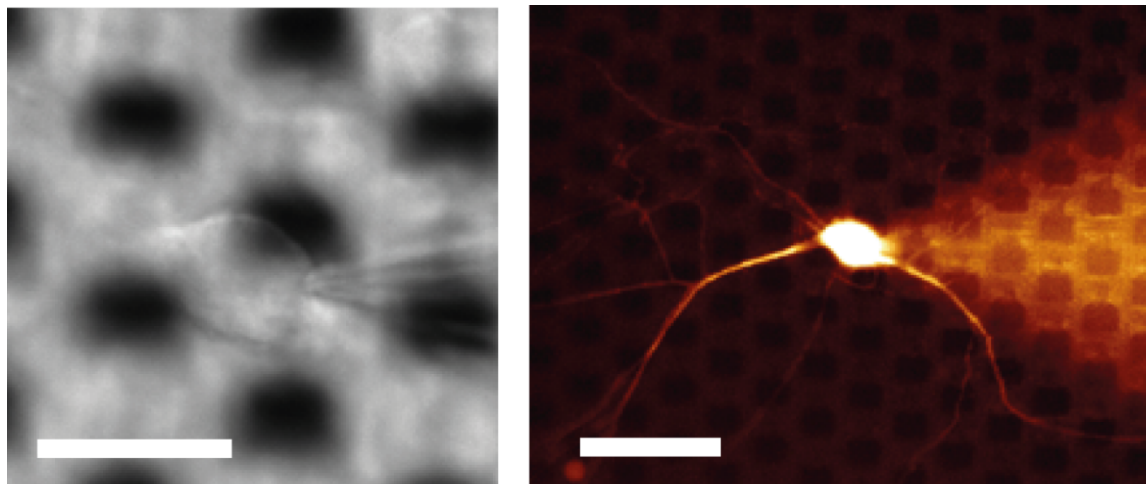

**Supplementary Figure 1**

*Left:* Bright field image of a patched neuron. In the background, the HD-MEA electrodes can be seen as black squares, scale bar: 20  $\mu\text{m}$ . *Right:* Fluorescent image of the same neuron, scale bar: 50  $\mu\text{m}$ .
